# Supplementary material for: Facilitating electrocatalytic hydrogen evolution via multifunctional tungsten@tungsten disulfide core–shell nanospheres
Source: Royal Society of Chemistry journal article supplement (doi:10.1039/d1ta01094h), 2021-01-01
Supplement: d1ta01094h1.pdf [file d1ta01094h1.pdf]

## Electronic Supplementary Information

### **Facilitating electrocatalytic hydrogen evolution *via* multifunctional tungsten@tungsten disulfide core-shell nanospheres**

Liang Ji,<sup>a</sup> Hongyu Cao,<sup>a</sup> Wensi Xing,<sup>a</sup> Shuaicheng Liu,<sup>a</sup> Qian Deng<sup>ab</sup> and Shengping Shen<sup>\*ac</sup>

<sup>a</sup> State Key Laboratory for Strength and Vibration of Mechanical Structures, Xi'an Jiaotong University, Xi'an 710049, China.

<sup>b</sup> Department of Engineering Mechanics, School of Aerospace Engineering, Xi'an Jiaotong University, Xi'an 710049, China.

<sup>c</sup> Department of Aeronautics & Astronautics Engineering, School of Aerospace Engineering, Xi'an Jiaotong University, Xi'an 710049, China.

\* Corresponding author. E-mail: [shen@mail.xjtu.edu.cn](mailto:shen@mail.xjtu.edu.cn)

#### **This file includes:**

Supplementary Figures S1-13

Supplementary Tables S1-2

Supplementary Equations S1-9

Supplementary References

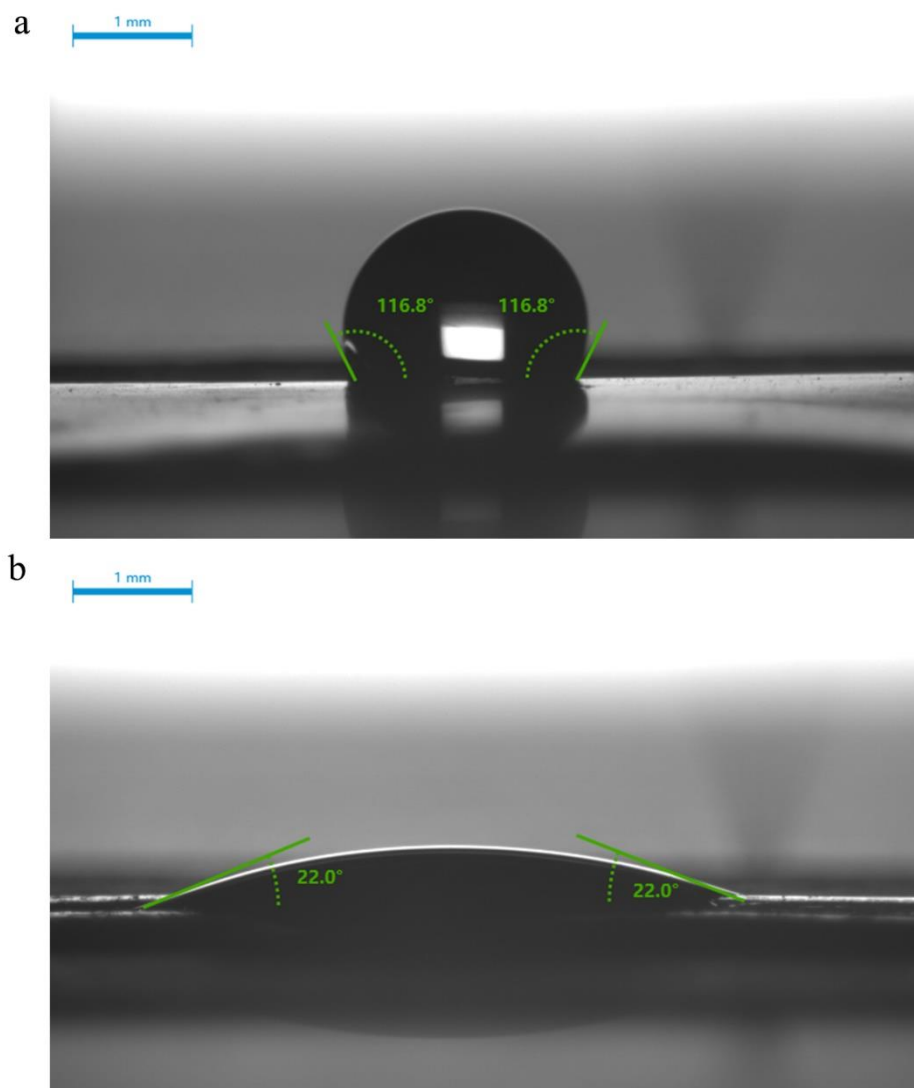

**Fig. S1** Photos of a 2 $\mu$ L 0.5mol H<sub>2</sub>SO<sub>4</sub> droplet on (a) MoS<sub>2</sub> and (b) WS<sub>2</sub> surfaces. Water contact angles for MoS<sub>2</sub> and WS<sub>2</sub> are 116.8° and 22.0°, respectively.

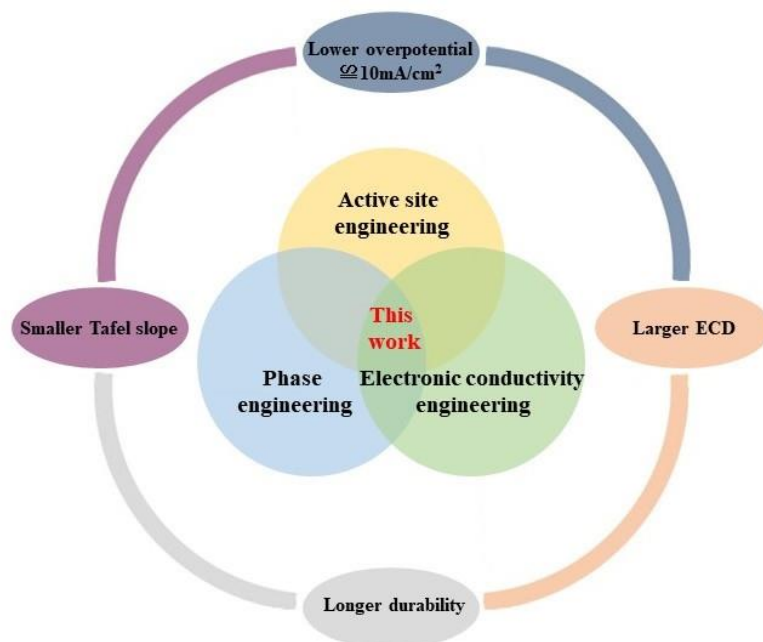

**Fig. S2** Aims and strategies of TMDs engineering.

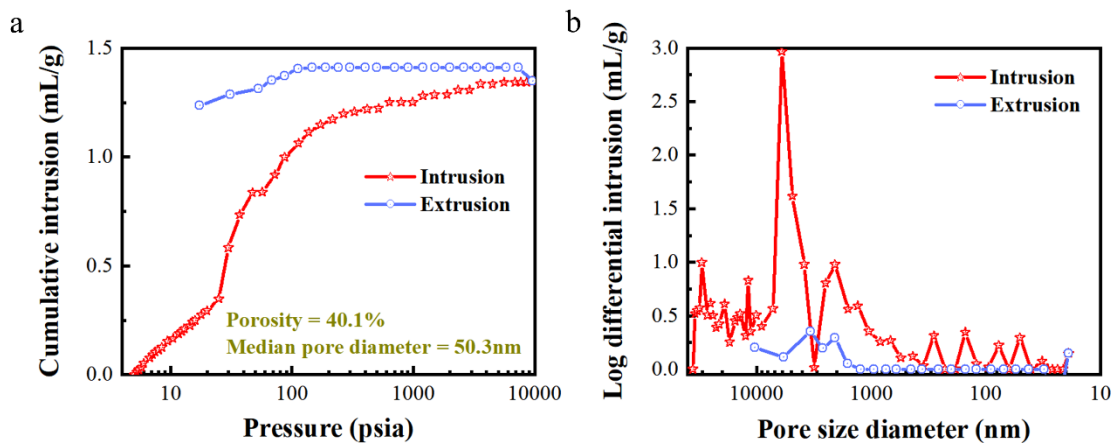

**Fig. S3** Mercury intrusion porosimetry tests of the nanoporous electrocatalyst. (a) Intrusion and extrusion curves and (b) pore size distribution.

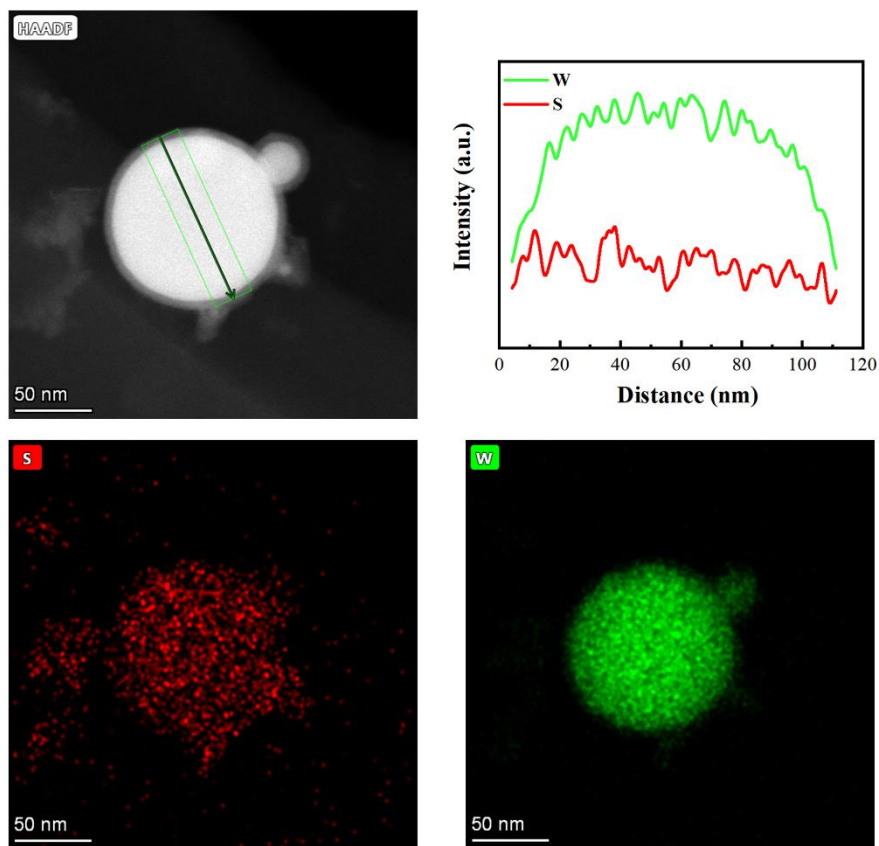

**Fig. S4** EDS mapping of the exfoliated nanosphere. Linear EDS data reveal that the core consists of dense W elements while the shell is made of relatively less dense W-S compounds. EDS signal of W elements is mainly concentrated at the center of CSNS and decreases as the distance away from center increases. Although the nanosphere is ultrathin in TEM tests, it is still a 3D sphere rather than a 2D circle. Therefore, S elements are usually detectable along the chosen line during linear EDS mapping.

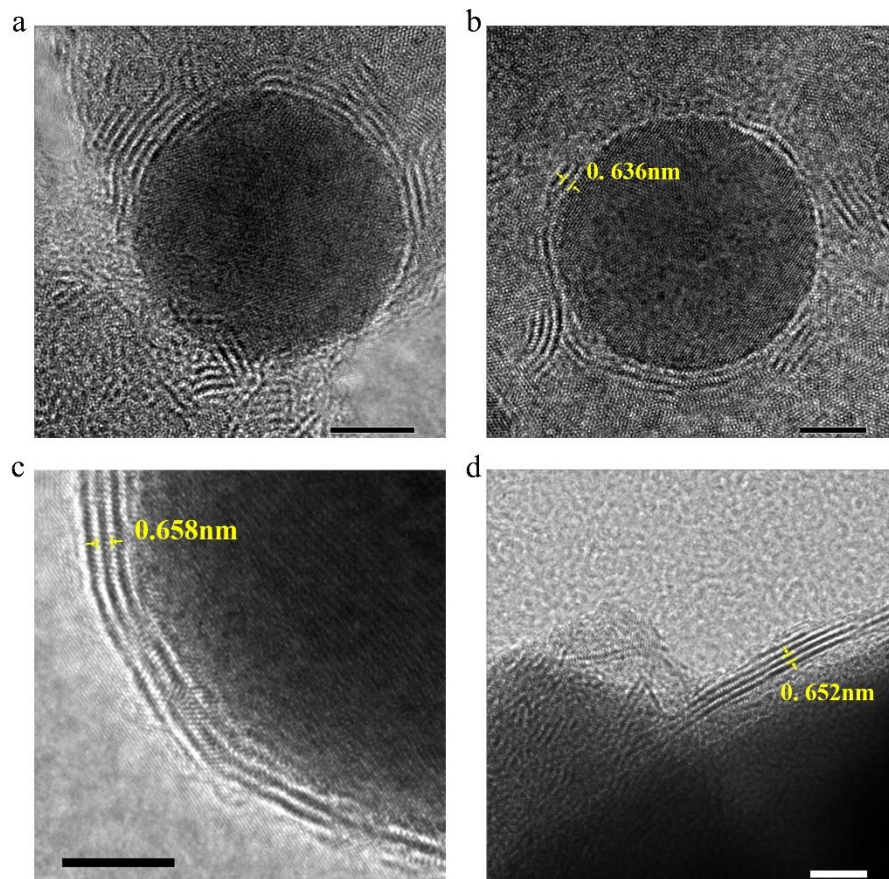

**Fig. S5** HRTEM images of the hierarchically curved W-S nanosheets. Scale bars: (a), (b), (c), (d) 5nm.

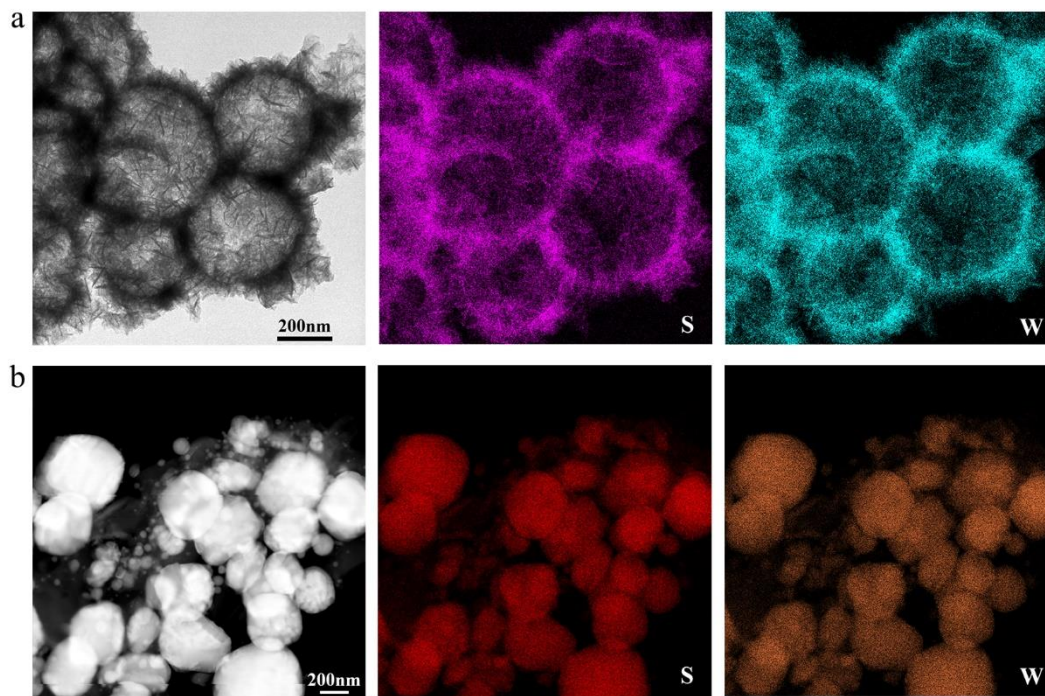

**Fig. S6** HRTEM and the corresponding EDS mapping images of (a) WS<sub>2</sub> hollow nanospheres and (b) WS<sub>2</sub> solid nanoparticles.

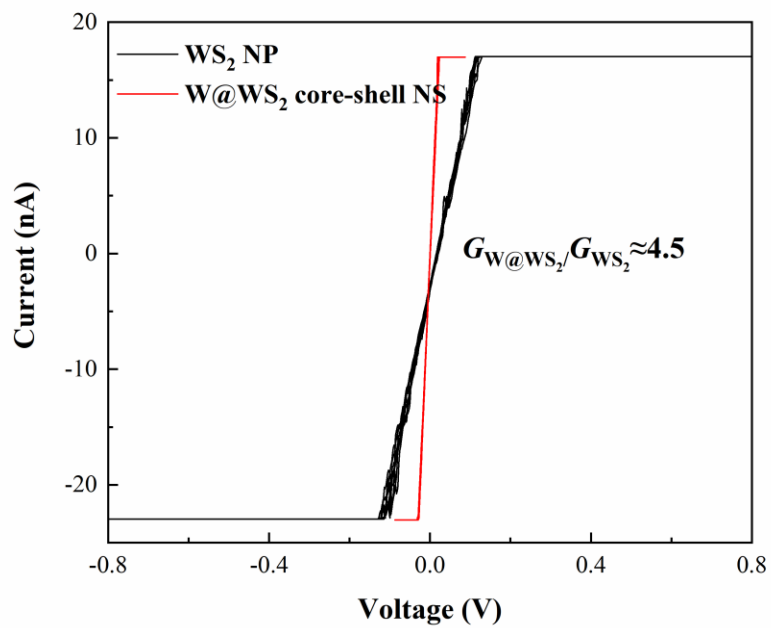

**Fig. S7** Electrical conductivities of the WS<sub>2</sub> solid nanoparticles-based electrocatalyst and the W@WS<sub>2</sub> core-shell nanospheres-aggregated electrocatalyst measured by cAFM.



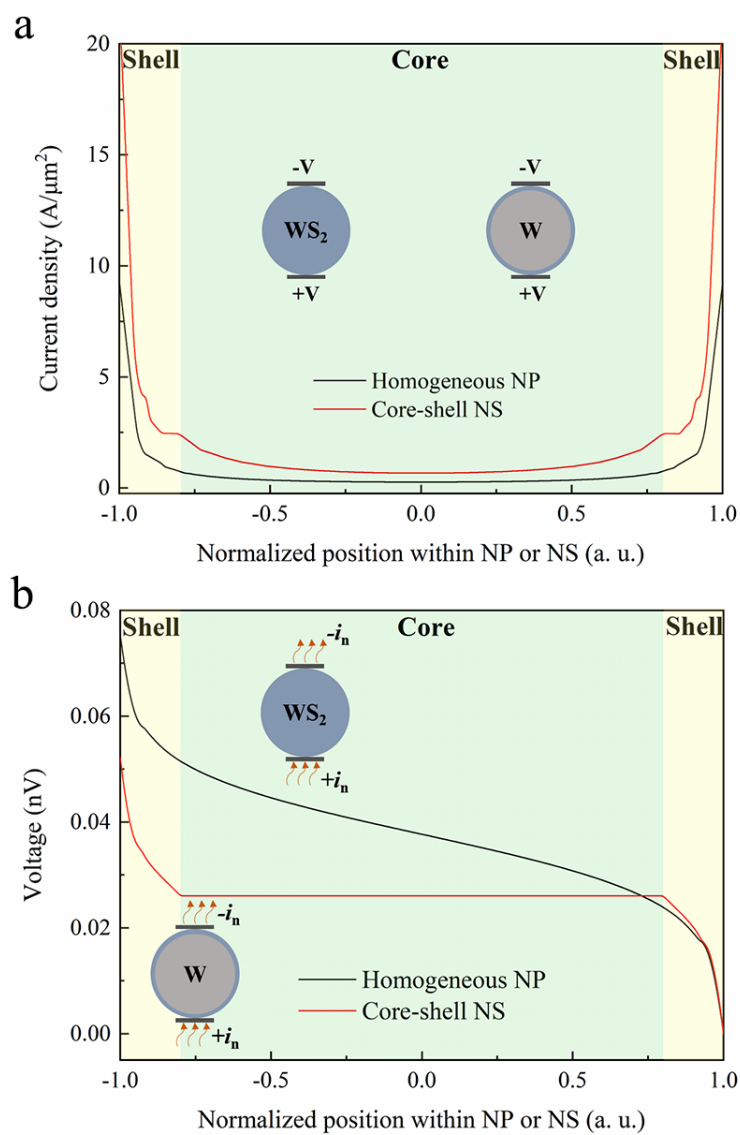

**Fig. S8** Electrical property of the  $\text{WS}_2$  solid nanoparticle and the  $\text{W}@WS_2$  core-shell nanosphere under (a) potentiostatic and (b) galvanostatic operations in numerical tests.

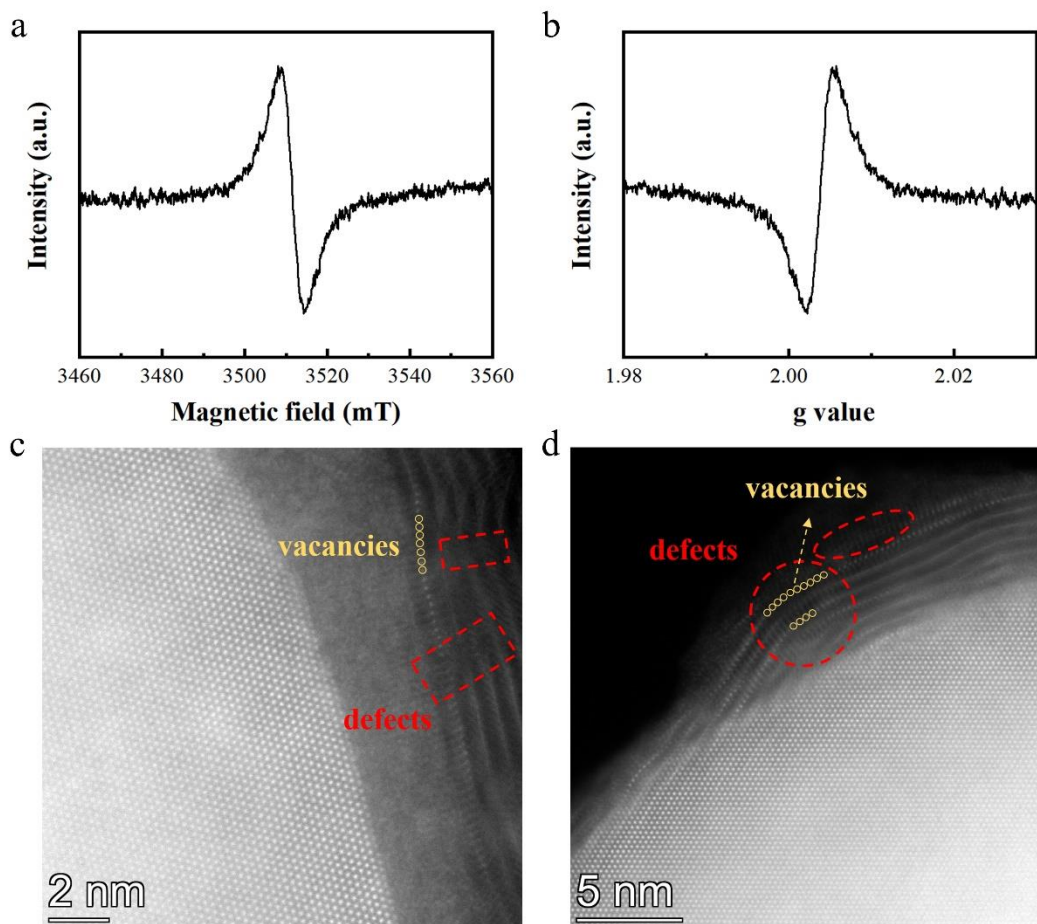

**Fig. S9** (a) First order differential spectra of electron paramagnetic resonance of W@WS<sub>2</sub> core-shell nanospheres subjected to varying doses. The nature of varying intensity profiles in response to different g values is shown in (b) for demonstrating S-vacancies in samples. (c) and (d), defects on curved WS<sub>2</sub> nanosheets characterized by scanning transmission electron microscopy.

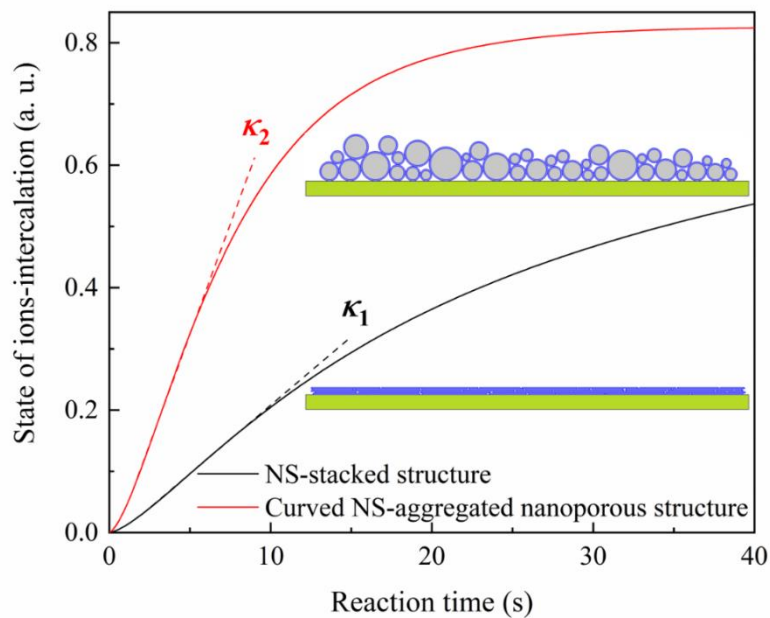

**Fig. S10** Comparison between average intercalation rates of the nanosheets (NSs)-stacked structure and the curved NSs-aggregated nanoporous structure. The values of intercalation states 0 and 0.8 represent un-intercalated state and 80% intercalated state, respectively.  $\kappa_1$  and  $\kappa_2$  reflect the response rates of NS-stacked and curved NS-aggregated nanoporous structures, respectively.  $\kappa_2$  is 3.2 times larger than  $\kappa_1$ , which means the response rate is greatly enhanced through core-shell nanospheres.

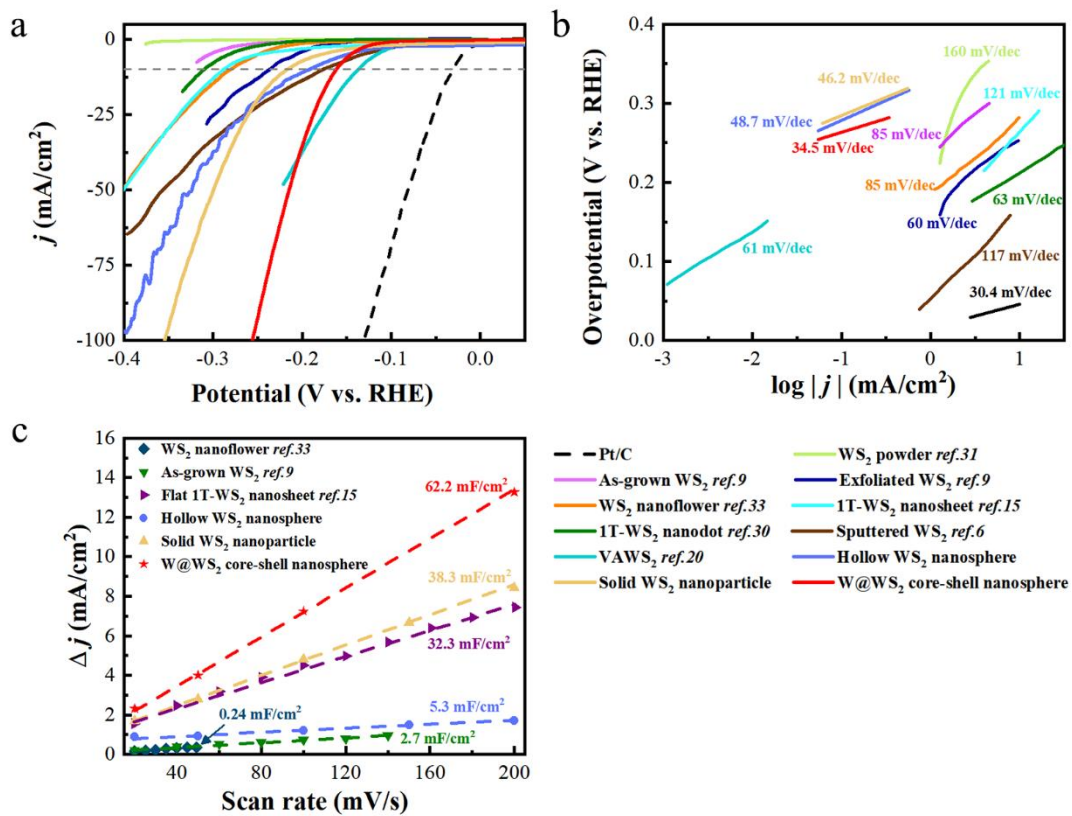

**Fig. S11** (a) LSV curves, (b) Tafel plots and (c) capacitive current density versus scan rate of WS<sub>2</sub>-based electrocatalysts.

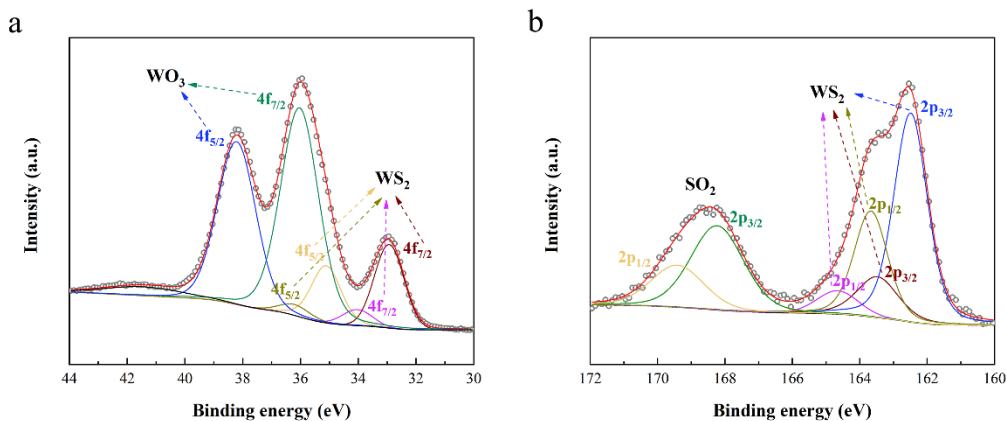

**Fig. S12** XPS spectra for (a) W 4f region and (b) S 2p region after durability tests, respectively. After long-term electrochemical tests and storage,  $WS_2$  would react with oxygen to form tungsten trioxide and sulfur dioxide ( $2WS_2 + 7O_2 \rightarrow 2WO_3 + 2SO_2$ ). Once the electrocatalyst is put into 0.5mol  $H_2SO_4$  electrolyte, sulfur dioxide would react with water ( $H_2O$ ) to form sulfurous acid ( $H_2SO_3$ ). Finally, sulfurous acid would also be oxidized to sulfuric acid ( $H_2SO_4$ ).

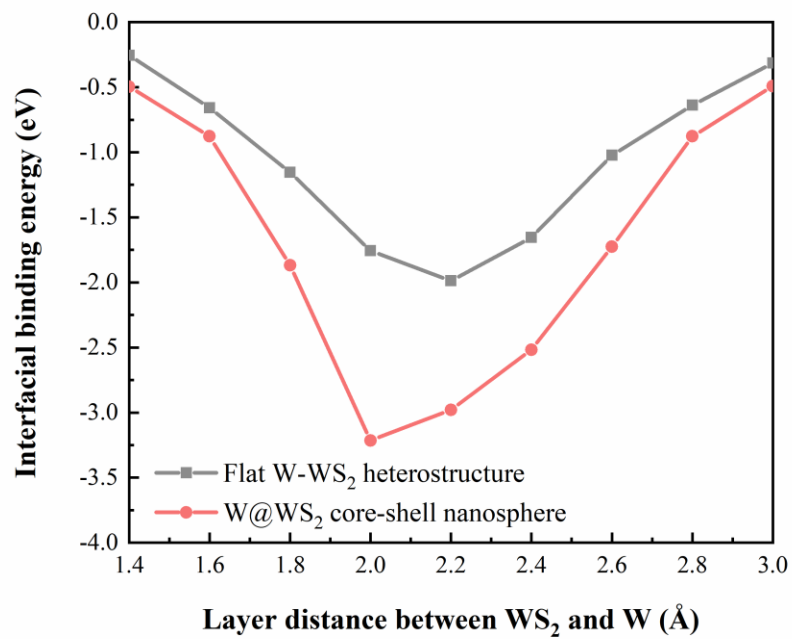

**Fig. S13** Interfacial binding energy versus the layer distance between WS<sub>2</sub> and W of flat W-WS<sub>2</sub> heterostructure and W@WS<sub>2</sub> core-shell nanosphere.

**Table S1** HER activities of tungsten compounds-based electrocatalysts.

| Catalyst                                              | Substrate        | Method                                                                  | Overpotential<br>at 10mA/cm <sup>2</sup> [mV] | Tafel slope<br>[mV/dec] | Durability  | C <sub>at</sub><br>[mF/cm <sup>2</sup> ] | Ref |
|-------------------------------------------------------|------------------|-------------------------------------------------------------------------|-----------------------------------------------|-------------------------|-------------|------------------------------------------|-----|
| WS <sub>2</sub><br>powder                             | GCE              | Thermal<br>treatment                                                    |                                               | 160                     |             |                                          | 31  |
| As-grown<br>WS <sub>2</sub>                           | Graphite<br>disk | CVD                                                                     | -330                                          | 85                      |             | 2.7                                      | 9   |
| 2H-WS <sub>2</sub>                                    | W foil           | SACVT                                                                   | -137                                          | 54                      | 200h        | 20.3                                     | 7   |
| 2H-WS <sub>2</sub><br>nanosheets                      | GCE              | Liquid<br>exfoliation                                                   | -205                                          | 70                      | 500 cycles  | 24                                       | S1  |
| WS <sub>2</sub> film                                  | Carbon<br>cloth  | Thermal<br>treatment                                                    | -210                                          | 68                      | 3h          |                                          | 8   |
| 1T-WS <sub>2</sub><br>nanosheets                      | Carbon<br>cloth  | Hydrothermal                                                            | -288                                          | 121                     | 12h         | 32.3                                     | 15  |
| 1T-WS <sub>2</sub><br>nanodots                        | GCE              | Ball<br>milling+Li-<br>insertion                                        | -310                                          | 63                      |             | 8.25                                     | 30  |
| WS <sub>2</sub><br>nanoflowers                        | GCE              | Hydrothermal                                                            | -280                                          | 85                      |             | 0.12                                     | 33  |
| Sputtered WS <sub>2</sub>                             | FTO              | RF sputter                                                              | -178                                          | 117                     |             |                                          | 6   |
| VAWS <sub>2</sub>                                     | W foil           | Exfoliation of<br>WO <sub>3</sub> +low-<br>temperature<br>sulfurization | -140                                          | 61                      | 14h         |                                          | 20  |
| WS <sub>2</sub><br>nanoribbons                        | GCE              | Solvothermal                                                            | -225                                          | 68                      | 1000 cycles |                                          | S2  |
| Defect-rich<br>WS <sub>2</sub> at<br>450°C            | GCE              | Partial<br>sulfurization<br>of WO <sub>3</sub>                          | -145                                          | 58.5                    | 1000 cycles | 31.6                                     | S3  |
| Strained<br>metallic<br>WS <sub>2</sub><br>nanosheets | GCE              | Chemically<br>exfoliation                                               | -220                                          | 55                      | 120h        |                                          | S4  |
| 20min<br>microwave<br>WS <sub>2</sub>                 | W foil           | Microwave<br>assisted                                                   | -151                                          | 70                      | 4h          | 47.8                                     | 9   |
| WS <sub>2</sub> @HNC<br>NFs                           | GCE              | Coaxial<br>electro-<br>spinning                                         | -282                                          | 60                      | 8h          |                                          | 31  |
| WS <sub>2</sub> /graphene<br>at 350°C                 | Ni foam          | Thermal<br>decomposition                                                | -135                                          | 46                      | 8h          |                                          | 12  |
| WS <sub>2</sub> @P,N,<br>O-graphene                   | Graphene         | Li-<br>insertion+Va<br>cuum filter                                      | -125                                          | 52.7                    | 20h         |                                          | 27  |
| WS <sub>2</sub> /Ni <sub>5</sub> P <sub>4</sub> -     | GCE              | Two-step                                                                | -97                                           | 74                      | 22h         | 47.84                                    | 13  |

| Ni <sub>2</sub> P                                    |                 | CVD                                              |      |      |                 |       |    |  |
|------------------------------------------------------|-----------------|--------------------------------------------------|------|------|-----------------|-------|----|--|
| W <sub>2</sub> C@WS <sub>2</sub><br>NFs              | GCE             | Hydrothermal                                     | -277 | 55.4 | 1000 cycles     | 12.28 | 33 |  |
| MoS <sub>2</sub> -WS <sub>2</sub><br>heterostructure | FTO             | Chemical bath<br>deposition+RF<br>sputter        | -129 | 72   | 20h             |       | 6  |  |
| ES-<br>WC/W <sub>2</sub> C                           | GCE             | Calcination                                      | -75  | 59   | 480h            | 97.8  | 38 |  |
| Ni(OH) <sub>2</sub> -<br>WP/CP                       | Carbon<br>paper | thermal<br>evaporation<br>+<br>electrodeposition | -77  | 71   | 18h             | 28.0  | 39 |  |
| Metallic 1T-<br>WS <sub>2</sub>                      | GCE             | PE-CVD                                           | -347 | 95   | 700h            |       | S5 |  |
| W <sub>2</sub> C NPs                                 | GCE             | carburization                                    | -123 | 45   | 10000<br>cycles |       | S6 |  |
| Ni/WC                                                | GCE             | Hydrothermal<br>method                           | -53  | 43.5 | 24h             | 66    | S7 |  |
| W@WS <sub>2</sub><br>core-shell<br>nanospheres       | Al foil         | One-step<br>pulsed<br>laser-<br>deposition       | -161 | 34.5 | ~100h           | 62.2  |    |  |

**Table S2** DFT calculation results.

| Nanostructure                               | Residual stress [Gpa] | Layer distance [Å] | Binding energy [eV] |
|---------------------------------------------|-----------------------|--------------------|---------------------|
| Flat W-WS <sub>2</sub><br>heterostructure   | 0.31                  | 2.24               | -1.98               |
| W@WS <sub>2</sub> core-<br>shell nanosphere | 0.17                  | 2.03               | -3.21               |

Formation of WO<sub>3</sub> is also beneficial for HER activity and electrical property of the electrocatalyst. Protons and electrons intercalate into WO<sub>3</sub> and then H<sub>x</sub>WO<sub>3</sub> is generated:

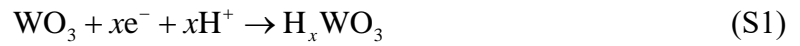

In this work, mechanism of HER in acids involves two steps. The first is Volmer step, which describes the reaction between a transferred electron and a proton:

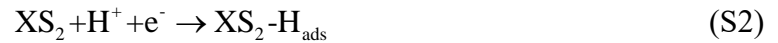



where  $\text{XS}_2$  represents TMDs-based electrocatalysts. As a result, an absorbed hydrogen atom is generated on the surface of electrocatalyst. Then, the second step is dominated by Heyrovsky reaction:

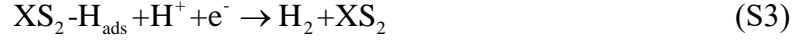

In Heyrovsky step, another electron reacts with the absorbed hydrogen atom and proton to yield  $\text{H}_2$ .

The rate of HER can be described by Butler-Volmer expression as follows:

$$j = j_0 \left[ e^{\frac{nF}{RT}\eta} - e^{-\frac{(1-n)F}{RT}\eta} \right] \quad (\text{S4})$$

where  $n$  is the number of charge transfer, which equals 2 in Heyrovsky-Volmer mechanism.  $j_0$  is exchange current density,  $\eta$  is overpotential,  $F$  is Faraday's constant,  $R$  is universal gas constant,  $T$  is temperature.

$$j_0 = \frac{RT}{nFAR_{\text{ct}}} \quad (\text{S5})$$

where  $A$  is geometric area of the electrocatalyst,  $R_{\text{ct}}$  is charge-transfer resistance, which can be measured in EIS.

The exchange current density can also be expressed as:

$$j_0 = nFk c_{\text{H}^+}^{1-n} \left( c_{\text{H}}^{\text{max}} - c_{\text{H}} \right)^{1-n} c_{\text{H}}^n \quad (\text{S6})$$

where  $k$  is rate constant of HER. With considering  $n$  as 2, the exchange current density is:

$$j_0 = 2Fk \left( \frac{c_{\text{H}}}{c_{\text{H}^+}} \frac{c_{\text{H}}}{c_{\text{H}}^{\text{max}} - c_{\text{H}}} \right) \quad (\text{S7})$$

where  $c_{\text{H}}$  and  $c_{\text{H}^+}$  are, respectively, the hydrogen and proton concentration at the surface of electrocatalyst with the standard state chosen to be the same as used to define the equilibrium potential.

Substituting Equation (S7) into (S4) gives:

$$j = 2Fk \left[ \frac{c_{\text{H}}^2}{c_{\text{H}^+} (c_{\text{H}}^{\text{max}} - c_{\text{H}})} \right] \left( e^{\frac{2F}{RT}\eta} - e^{-\frac{F}{RT}\eta} \right) \quad (\text{S8})$$

The ECSA is calculated from electrical double-layer capacitance ( $C_{\text{dl}}$ ):

$$\text{ECSA} = \frac{C_{\text{dl}}}{C_s} \quad (\text{S9})$$

where  $C_s$  is the specific capacitance of planar sample with smooth surface. For  $\text{WS}_2$  tested in  $0.5\text{mol H}_2\text{SO}_4$ , it approximately equals  $60 \mu\text{F cm}^{-2}$ .<sup>S8</sup>

## References

- [S1] G. Q. Han, Y. R. Liu, W. H. Hu, B. Dong, X. Li, Y. M. Chai, Y. Q. Liu and C. G. Liu, *Mater. Chem. Phys.*, 2015, **167**, 271-277.
- [S2] J. Lin, Z. Peng, G. Wang, D. Zakhidov, E. Larios, M. J. Yacaman and J. M. Tour, *Adv. Energy Mater.*, 2014, **4**, 1301875.
- [S3] Y. Ling, Z. Yang, Q. Zhang, Y. Zhang, W. Cai and H. Cheng, *Chem. Commun.*, 2018, **54**, 2631-2634.
- [S4] D. Voiry, H. Yamaguchi, J. Li, R. Silva, D. C. B. Alves, T. Fujita, M. Chen, T. Asefa, V. B. Shenoy, G. Eda and M. Chhowalla, *Nat. Mater.*, 2013, **12**, 850-855.
- [S5] H. U. Kim, V. Kanade, M. Kim, K. S. Kim, B. S. An, H. Seok, H. Yoo, L. E. Chaney, S. I. Kim, C. W. Yang, G. Y. Yeom, D. Whang, J. H. Lee and T. Kim, *Small*, 2020, **16**, 1905000.
- [S6] Q. Gong, Y. Wang, Q. Hu, J. Zhou, R. Feng, P. N. Duchesne, P. Zhang, F. Chen, N. Han, Y. Li, C. Jin, Y. Li and S. T. Lee, *Nat. Commun.*, 2016, **7**, 13216.
- [S7] Y. Y. Ma, Z. L. Lang, L. K. Yan, Y. H. Wang, H. Q. Tan, K. Feng, Y. J. Xia, J. Zhong, Y. Liu, Z. H. Kang and Y. G. Li, *Energy Environ. Sci.*, 2018, **11**, 2114-2123.
- [S8] W. Liu, J. Benson, C. Dawson, A. Strudwick, A. P. A. Raju, Y. Han, M. Li and P. Papakonstantinou, *Nanoscale*, 2017, **9**, 13515-13526.
